# Supplementary material for: Deep sequencing of 1320 genes reveals the landscape of protein-truncating variants and their contribution to psoriasis in 19,973 Chinese individuals
Source: HighWire-hosted journal article supplement (doi:10.1101/gr.267963.120), 2021-06-21
Supplement: Supplemental_Table_S4.xlsx [file Supplemental_Table_S4.xlsx]

## Sheet: Table S4. 1,320 targeted genes 
PKDCC
CARKD
RNF114
PNMT
ATP2A1
ITGA4
ITGA7
PAMR1
CYP27B1
FBXL19
FAM169B
ITGAX
ITGAV
ITGAM
ITGAD
AFTPH
SMAD3
TMPRSS11F
ART4
CCDC110
LEO1
CPEB4
TP53TG5
CTCFL
LRGUK
CFH
SIX2
SIX3
KNDC1
HMG20A
MRO
RFPL1
NRXN3
YDJC
KRTAP10-10
GJA5
SEZ6L
APIP
TMC2
ITGA2B
STMN3
CFHR3
CFHR1
CFHR4
CFHR5
KIAA0020
TMEM145
TMEM141
OR5AN1
SMOC2
CDC5L
AIRE
CLEC14A
GSDMB
UPK1B
PTPN11
MRPL27
SEH1L
NDRG2
SRSF4
CHD1L
RNF139
KRTAP19-7
TSSK4
SRR
ASAP1
ASAP2
KRT28
SLCO1B1
GCNT3
KRT20
PIGG
SERPINB8
CCDC171
PECR
ZFAND6
ZFAND4
SWT1
RASSF7
RASSF6
NPC1
TTC3
PRDM16
PLSCR4
HNF4A
POLRMT
C4orf32
ZFP36L1
ZFP36L2
GGA3
PKD1
PRKACG
PSMB1
RMI2
KCNK5
VPS13B
KIAA0556
GNA12
KLHDC8B
IL6ST
SBF2
C11orf35
C11orf30
SEMG1
OR3A4P
AKAP6
GTF2F1
AKAP8
RRP1B
HSP90B1
CETN3
CETN1
FSIP1
SORT1
INTS6
MTNR1B
MTNR1A
LDLR
IL2RA
IL2RB
SLC17A5
CMTR2
FMO2
KCNAB3
OMA1
RHO
SCHIP1
KRT72
ATM
HAAO
ADAM30
AAMP
PODXL2
FAXC
SLC22A16
PTK2
RCSD1
SORBS1
IL18RAP
ATG16L1
EOMES
USH1C
MATN4
RAET1L
CCDC77
OR2G3
CSHL1
SPEN
TBATA
NT5E
NUTM1
SPICE1
EPB41L5
TAGAP
ZNF816
VEPH1
KLF14
TFAP2B
DNPH1
KLK2
NDUFS4
UFD1L
MICAL2
PHC1
LMAN1
ZNF365
PRF1
PRPF40B
PPP1R27
FLG
C7orf31
NLRX1
ICOS
HHEX
ANKS1A
ACTRT3
MEPE
WNT8B
DNMT3A
SALL3
C3orf17
LARP1
DDX49
PTER
ZGPAT
LGR5
FAM151A
REG3G
TMEM129
TMEM74B
FBXO39
PTTG1
SKA1
E2F7
LIPC
LIPE
LIPG
MRPL41
LAMB1
ASTN2
CCDC162P
CCDC7
TBP
GSS
IFI27L1
ZNF433
RTCB
STX5
CLIC6
CDADC1
CASQ2
CCT8L1P
CELSR2
TBKBP1
FEZ1
IL21
IL22
IL27
IL26
ADCY4
ADCY3
LRRC32
SPATA2
XRCC2
PITPNB
SMURF1
TCP1
CTLA4
OPTN
CCDC36
CCDC34
PLA2G2E
HS3ST2
THUMPD3
MLLT3
KERA
PCDHA6
PCDHA9
BCL6
TTYH3
OASL
CSNK1G3
FAM76B
ATP8B1
OGFR
STC2
SPATA12
NRD1
POMC
ACHE
RIN3
WWOX
NOX4
RPS12
RPS11
LATS1
GGT5
PTPRU
PTPRD
PTPRK
BANK1
OR5J2
ABLIM1
KRT15
TMPRSS3
OR4L1
NAT2
OLFML2A
VAV2
CPSF1
OR3A1
SIPA1L3
LTBP1
PLA2G4F
MBD4
LMAN1L
STAT4
SLC25A11
STAT3
VIT
TYR
ALG1
RTN2
IRF1
IRF5
IRF4
IRF8
CLK2
CSF2RB
PANX1
ARAP1
KLKB1
NOTCH2
ZNF652
PARK7
ROR1
KPNA7
TNFRSF14
QPCT
B4GALT6
DHRS12
CR2
TNFRSF1B
TNFRSF1A
PTPN2
FOSL2
CD69
EFCAB13
SHCBP1
CAPSL
WDR12
INO80D
APEH
GLIS3
GLIS1
SLC25A36
TMEM180
ELMO1
RTEL1
HSPA13
MINA
FAM160B1
PLEKHA8P1
VPS26A
IL12B
IL12A
OR51L1
CIT
C1orf174
DAP
LRP11
CUBN
GPC2
GPC5
BBS2
SLC28A3
SLC28A1
PIK3CD
FUT2
FAM84B
IGLL3P
MAF
BACH2
PRSS53
RAB11FIP5
IFIH1
FYCO1
CD44
CTSL3P
CHCHD2P9
RAB23
CUEDC1
CALR
PRPF3
PRPF4
C5orf46
ZFP64
ZPBP2
KCNG2
TMEM255B
CEP97
AXDND1
TRAF3IP2
TNS4
ARID2
OR8D4
TRIM2
SH3RF2
CHPF2
TOR1A
FCGR2B
FCGR2A
ACSM1
DCD
THRB
CUL2
PER3
DNAJC27
SP140
ICOSLG
FAM196A
ANXA11
SLC39A11
MRPL2
KMO
CTDP1
CBLN2
EVI5
CAMK1D
CAMK1G
NLRP12
LYPD5
RGS6
RGS1
RGS2
RDH14
ZSCAN29
ZSCAN21
CD28
TRHDE
TDRD1
EIF4G1
FAT1
ULBP3
COL27A1
PRODH
FAM120B
ZNF518B
TACC2
TACC3
MKI67
ZNF551
ALDH1B1
PCDH9
PCDH1
TAB1
TARBP1
TMCO4
PTGER3
TOR3A
TNFRSF9
ZIC1
ING1
GDPD3
INS
WDFY4
SLC2A12
SLC2A10
ITPR2
BSN
RIF1
ABCG2
SLC27A3
AK9
TBCE
TBCC
NPNT
SARS
GEN1
ITLN1
ESYT1
IFNLR1
MTMR3
TSC22D4
EXOSC5
ADAMTSL2
DISC1
IFI16
FANCA
FANCM
CLHC1
IRS1
CDK2
CDK4
CDK6
LPAR3
HAPLN1
HOXA9
RERE
SUN3
ATP10A
PRKCQ
CTSH
SYK
LIF
AFF3
GCKR
UBA7
PTGFR
CPXM2
GPR65
MAEL
IL3
JARID2
NT5C1A
TIMP4
SUSD3
SUSD1
BRINP3
PDXDC1
DDX6
NFKBIZ
SLC5A11
ACVRL1
KIAA1109
TNFAIP3
JAZF1
DENND1B
FADS1
TSEN54
RFTN1
USP12
POGLUT1
UBAC2
TYK2
ARHGEF19
ISOC2
CEP72
CHCHD6
MST1
GZMB
GZMK
VWF
REL
B4GALNT3
WT1-AS
DMXL2
CA4
GHR
VTCN1
CYLD
SH3TC2
SULF2
TRAM1
F13A1
UIMC1
LPHN1
ETS1
FCRL3
VAMP3
MERTK
VRK2
CCL21
TNIP1
USP31
MORN2
RUNX3
DOCK8
SLC9A4
SCNN1G
SLC23A2
ARHGEF39
SCUBE1
MYOM2
ZNF530
LCE2B
PPIG
NPAS3
LZIC
MALRD1
HECTD4
LZTFL1
ADAD1
COG6
YWHAG
CFTR
KCTD18
ANKRD55
SPECC1L
SIRT5
FAM57B
RBM28
SCN7A
SEMA3F
ZNF259
TH
KCNJ11
TAPBPL
C1QTNF6
C6orf120
SNAP29
TNFSF11
TNFSF15
TNFSF18
MRPS21
LINC00523
SLC4A1
PLCL1
OR14A16
LSP1
AARS2
APOL1
NOS2
ITGB6
NR2C1
SLC12A3
LBH
FGA
SLC11A1
PDE5A
UHRF1BP1L
LGALS14
AHI1
FABP2
COL5A3
TCF20
ATP5F1
ASAH1
MED17
PSME4
MTSS1
BAI3
SLC9A8
SLC30A8
SLC30A7
CETP
RSPO3
NCAPG
RERGL
SULT1C3
B3GNT2
PEX5L
C17orf51
C17orf53
CCR1
CCR3
CCR4
CCR6
OLFM4
CCR9
BCAS1
CD80
CD86
ZBED2
EFNA4
CDS2
GALNT18
ANTXR2
LIMK2
TEAD4
PTPN23
ESRRA
CNTNAP2
FAM213B
ASB14
HK3
MOB3B
MSRA
BATF
DQX1
PDHX
PTPRN2
SLC10A2
LRRC18
IDE
NCAM2
CCDC103
POLD1
NFKBIA
DMKN
HSPA2
FTMT
TRAM1L1
CBLB
TRAPPC9
LILRB5
PSMG1
TACR3
KCNH7
SULT1A1
SULT1A2
NOL9
SH2B3
SH2B1
OLIG3
CHAF1A
CDCA3
UTS2
PLB1
SASH1
SPG11
PCK2
PCK1
SYTL2
SPRED2
CARD9
PTH2R
FAM92B
ACOXL
PLCH2
DLD
AP4E1
TEX10
CSMD1
NDFIP2
NDFIP1
LRRC39
CYP24A1
ZNF33B
SVIL
TCEB2
BMPER
UQCRH
CACNA1D
CACNA1S
MC2R
SLC15A2
LLGL2
SLC15A4
TTC19
ZFP90
PAX5
PAX7
DDR2
NAGA
PSMA6
FBXO47
KRTAP15-1
TRAFD1
SFRP4
C9orf139
ANGEL1
AP3B1
C19orf33
EPCAM
KLK11
SOCS6
IL17REL
NPAP1
IL1R2
LRRK2
TGFB1I1
MRPL11
CDC25C
AIFM2
AIFM3
IL17RC
IL17RB
OPN3
NBN
NFKB1
PDZRN4
ZNF319
OVOL1
ERRFI1
CCDC141
PCBP3
IFNK
IFNG
SLC45A2
IL7R
PTRHD1
BMS1
AHSA2
OR4K2
SETX
AUH
FRMPD2
LMO7
ERBB3
DDX11
GJB2
2021-03-01
CLSTN1
CLSTN3
CDKN2B
CDKN2A
CCL2
CCL7
RRBP1
TCTE3
ALKBH3
PVR
MSH6
XCR1
C16orf47
PADI3
PADI4
ZPLD1
NRIP1
SAE1
TRIM16
NTAN1
NME6
INPP5E
RAI14
ZNF528
EPB41
PNPLA3
STEAP2
FLG2
PHTF1
THRAP3
IL19
IL10
IL13
GSTM4
PIP4K2C
MMEL1
RBMS1
ANXA7
ANXA6
KIFAP3
MBIP
ZNF146
C20orf26
FCGBP
FASLG
FOXK2
CCDC69
KANSL1L
SH2D6
PGM1
PGM3
ABCB11
CDC23
PDZD7
MYNN
SORCS1
TNPO3
MAPK1
NEO1
SERINC3
METTL1
C1orf106
SLC18B1
PXK
MLC1
RIOK2
RNF168
ZBTB46
NTNG2
ZFYVE16
MALT1
ALOXE3
IQCC
PCDHGC4
MUC15
RASGRP3
KCNK12
NCAPD2
BLK
ATXN2
DLK1
EPS8L1
GPRC5A
TSC1
TTC7A
HNF1B
HNF1A
CRISP1
IL37
CBR3
DAB2
HYOU1
RAB5B
ERAP2
ERAP1
GRB14
CNTN4
CNTN5
NUPR1
UBE2E3
DNAH5
SPRY2
CD40
COASY
TNFSF14
AIM1
C11orf82
NOD2
HCLS1
CLN3
ACSM2B
RNF186
TCF7L2
LIMCH1
SYT14
DTNBP1
CDC14A
GPR171
C2CD4A
RPS26
SLC22A5
SOD1
PRDM1
CASP2
MYC
MYB
ENTPD6
ENTPD5
SNAPC4
HUNK
ODF4
EFEMP1
KIF3B
KIF3A
HIC2
TMEFF2
CIITA
NCF2
HNRNPH3
OR10X1
FAM209B
INO80
UNC13A
KCNB2
LEKR1
CNTNAP3
FRMD4B
PAPSS2
HORMAD2
WDSUB1
WDR7
IPCEF1
ZNF286A
IRGM
FTO
POLN
CDC123
TRIM50
POLH
LAMA4
C2CD2L
PRC1
IL12RB2
HSD17B7
RTN4
ABO
ATP4A
ZNF467
IL1RL1
IL1RL2
PKP1
POPDC3
LPP
LPL
CNOT1
CLECL1
PKHD1
WFS1
DDAH1
TIRAP
GALNT8
GALNT5
KIF11
FASTKD5
FASTKD2
FASTKD1
WDR27
REP15
IGF2BP2
KIF1B
CD247
NLRP11
NLRP10
MRPS11
PFKL
CLEC4F
DEFB129
SLC25A21
SMTNL2
IMPG1
RPAP2
VHLL
C6orf57
ICAM4
ICAM3
ICAM1
TMTC4
MAP4K3
SPATA22
OR4A15
NEFH
MBP
XYLT1
MMADHC
SCAMP3
RTL1
CELA3B
NEGR1
MSRB3
TSPAN8
GFRA1
FAM175B
THBS1
OSM
ARG1
PPBP
HMGA2
TADA1
CD58
UGT1A7
RAB38
MCEE
PLS1
PDIA4
SPATA6
HSPA6
PCSK9
CD226
ITPKC
JRKL
MUC1
CRB1
OR5D13
SESN3
SLIT2
MUC19
CYP4F2
TBL3
MANBA
EDIL3
SERINC2
TCF7
GCK
EPS8L3
RPS6KB1
ENKUR
MRGPRX1
TNFRSF6B
BUD13
TNFSF4
ST6GAL1
PRDX5
AP3S2
TRIM54
LYPLAL1
DCAF4
ZSCAN32
R3HDM2
HMGCR
ORMDL3
KIF5A
ACADS
HSPG2
SEC16A
USP45
CX3CL1
TNP2
ADAMTS18
SLC6A18
TMEM207
SLC6A15
GALC
RASGRP1
FBXO36
ATG5
CD27
KRTAP13-4
RBPJ
ADAM7
ADAM2
RPL5
NEBL
IGF2-AS
IL22RA2
PSG9
RHOH
RHOB
ZNF620
HR
FHDC1
MEIG1
PRM3
TRAF1
MOCS2
BPIFB1
NPR2
KAZALD1
OR5A2
CD1D
NRSN1
ANO6
CELF4
ANO3
MC4R
JAK2
GRM5
PPARG
OR52A5
SPDEF
CD19
LHFPL3
C10orf67
GIPR
LPIN2
LPIN3
SNTG1
EFR3B
HEATR2
FAM189B
SLC1A7
ZNF549
ATP13A5
C2orf74
RARB
JAKMIP2
SNAI1
CEACAM8
RFK
EXOG
CDC37L1
TIGD2
COL25A1
COBL
BPI
TSHR
SEMA6D
SEMA6A
INPPL1
ADCK1
LTBR
MAP3K7
TPGS2
NUP210
FMO4
PASK
PSRC1
PCNXL2
DNER
OR5C1
KRT83
WAC
C1orf158
C5orf34
C5orf30
FARSA
STX17
C9orf72
ZMIZ1
IL23A
OR9G4
IL23R
SUOX
DPP6
CEP68
TMIGD2
OR10R2
TRMT61B
ZFYVE1
DGCR8
RNASE2
BRAT1
CCDC81
FBXL4
NOX3
APH1B
SLC26A3
SDC4
NAA25
SGCD
HDC
TBC1D14
BMP10
MPHOSPH9
TCERG1L
RHCG
TXNDC12
SCFD2
SCG3
SQRDL
CRTAC1
LRP6
NPS
KCNQ1
PTGER4
OTUD3
SERHL2
HTRA4
COL2A1
HTRA1
CXCR2
CXCR1
CXCR5
CXCR4
EXOC3
ANK1
ANK2
ADAMTS3
ADAMTS2
ADAMTS9
ARHGEF3
CDH1
CDH5
CENPO
CENPC
CENPW
PLEKHA5
PLEKHA6
TRIB1
DHX34
ZNF767
RPL41
MYH7
MYH9
MACC1
SATB2
CNNM3
POLA2
PHF10
SLC5A6
SLC5A9
TOM1L1
ATAD3A
CARD10
CARD14
CASC1
DLL1
MYEOV2
NDUFB7
GPR31
GPR35
NAALADL2
FMNL1
ANKRD45
SCEL
GUCY2D
KANSL1
TRIAP1
EPHB3
TP53INP1
RASIP1
SH3GL2
PUS10
ZNF248
KCNS3
C17orf66
OR2M5
ARID3C
ADPRHL1
ACP5
GLRX5
ACP6
AHCYL2
CAPN7
CAPN3
CAPN2
DLEU1
SDCCAG3
MAMDC4
ST18
NELL1
PLEK
TMEM17
ZNF746
LCE3D
LCE3A
ODF3L1
MPV17L2
OR56A4
KIF21B
BCL11A
UBASH3A
GRHL2
C1GALT1
PIM3
IL18R1
TNN
PREX1
RNLS
CYP2C9
GRB10
LAT
ETAA1
CAV2
KCNMA1
SLC22A4
SLC22A7
SLC22A1
SLC22A9
RBM17
ALK
ABCA7
PSMD9
NMUR2
KCNU1
C11orf53
CCDC101
FBN2
DAP3
HDAC4
CST2
GMPPB
CMC1
AMIGO3
AMIGO2
USP2
SOX8
SOX6
SOX5
CEBPA
TPPP
PHKB
INTS8
TNFRSF11B
CHRNA9
INHBB
MFI2
EXTL2
SYNC
THADA
SPACA7
SPACA1
SPACA3
OTOA
OTOF
STK36
SYN2
THEG
CD4
LAMC2
CD6
CEP164
STAT2
GABRB3
MRPS22
ELF1
TPRG1
FRMD5
SLC2A4RG
BDNF
ENPP3
DKKL1
UBE2L3
PREX2
IFT122
SLC14A2
ETV6
IKZF4
IKZF1
IKZF3
SLC13A2
NFIA
IFNA5
CLEC16A
CCAR2
UPK3A
SELL
SLC7A10
