# Supplementary material for: Deep sequencing of 1320 genes reveals the landscape of protein-truncating variants and their contribution to psoriasis in 19,973 Chinese individuals
Source: HighWire-hosted journal article supplement (doi:10.1101/gr.267963.120), 2021-06-21
Supplement: Supplemental_Table_S10.xlsx [file Supplemental_Table_S10.xlsx]

## Sheet: Sheet1
Table S10. selection signals of PTVs with significant Z values (Z>4.3, comparable to P<0.05/1,824) after Bonferroni correction based on empirical distribution of FST.
CHR	dbSNP	Gene	Consequence	CHN	Cases	Controls	AFR	NFE	FST (P)*	FST_CHN-AFR (P)	FST_CHN-NFE (P)	FST_AFR-NFE (P)
chr19	rs601338	FUT2	stop_gained	0.00815869	0.00845771	0.00799603	0.502833	0.466661	0.746 (0.00E+00)	0.674 (0.00E+00)	0.396 (0.00E+00)	0.003 (4.79E-01)
chr1	rs28369860	FMO2	frameshift_variant	0.000901217	0.000794997	0.001113	0.266455	0.0467912	0.530 (0.00E+00)	0.462 (0.00E+00)	0.036 (3.93E-03)	0.271 (0.00E+00)
chr21	rs34966432	TMPRSS3	splice_acceptor_variant	0.323678	0.32699	0.322186	0.127756	0.079541	0.497 (0.00E+00)	0.089 (4.08E-05)	0.189 (0.00E+00)	0.015 (1.39E-01)
chr17	rs76299620	EFCAB13	splice_acceptor_variant	0.178716	0.185446	0.170341	0.0100444	0.01642	0.495 (0.00E+00)	0.107 (9.37E-07)	0.168 (0.00E+00)	0.001 (5.23E-01)
chr19	rs747005499	DMKN	frameshift_variant	0.133665	0.130407	0.137117	0.123146	0.012186	0.424 (0.00E+00)	0.000 (5.29E-01)	0.093 (1.02E-12)	0.218 (0.00E+00)
chr17	rs10538163	EFCAB13	splice_donor_variant	0.280432	0.27491	0.284828	0.555951	0.545489	0.403 (0.00E+00)	0.152 (4.50E-12)	0.132 (0.00E+00)	0.000 (5.61E-01)
chr17	rs71377306	EFCAB13	stop_gained	0.209769	0.21237	0.208947	0.0106775	0.058894	0.384 (0.00E+00)	0.129 (4.32E-09)	0.105 (0.00E+00)	0.023 (3.56E-02)
chr1	rs9427397	FCGR2A	stop_gained	0.00242828	0.00259699	0.00249099	0.0255622	0.138306	0.371 (0.00E+00)	0.036 (5.89E-02)	0.109 (0.00E+00)	0.056 (1.53E-06)
chr1	rs850763	SLC5A9	stop_gained	0.0113802	0.0114119	0.0111441	0.133925	0.16641	0.357 (0.00E+00)	0.188 (0.00E+00)	0.117 (0.00E+00)	0.004 (4.36E-01)
chr11	rs201238608	OR8D4	frameshift_variant	0.000100241	0.000106078	5.30617e-05	0.0584391	0.00020982	0.349 (0.00E+00)	0.129 (3.87E-09)	0.000 (5.44E-01)	0.182 (0.00E+00)
chr6	rs111656694	WDR27	splice_donor_variant	0.00102639	0.001007	0.00106	0.086037	0.00779794	0.323 (0.00E+00)	0.182 (0.00E+00)	0.004 (4.12E-01)	0.154 (0.00E+00)
chr17	rs144853553	EFCAB13	splice_donor_variant	2.50338e-05	0	5.29998e-05	0.0540016	0.000707022	0.316 (5.33E-15)	0.122 (2.66E-08)	0.000 (5.29E-01)	0.160 (0.00E+00)
chr4	rs3833632	POLN	frameshift_variant	0.060008	0.0614315	0.0587111	0.000675676	0.00268072	0.259 (1.44E-10)	0.038 (5.26E-02)	0.067 (2.19E-07)	0.001 (5.40E-01)
chr20	rs6049157	CST2	stop_gained	2.50338e-05	5.29998e-05	0	0.0349798	7.49221e-05	0.241 (2.29E-09)	0.080 (1.91E-04)	0.000 (5.44E-01)	0.116 (0.00E+00)
chr12	rs71045297	CLECL1	frameshift_variant	0.398393	0.394402	0.40352	0.710131	0.49782	0.224 (2.91E-08)	0.173 (4.77E-15)	0.020 (8.05E-02)	0.084 (6.69E-13)
chr1	rs863362	OR10X1	stop_gained	0.640697	0.646597	0.634354	0.574697	0.464396	0.216 (8.86E-08)	0.009 (3.71E-01)	0.060 (2.90E-06)	0.024 (2.98E-02)
chr17	rs118004742	EFCAB13	stop_gained	0.000675912	0.000688997	0.000688997	0.0128507	0.0645783	0.207 (2.88E-07)	0.023 (1.68E-01)	0.051 (6.90E-05)	0.024 (2.85E-02)
chr6	rs113569197	SLC22A1	splice_donor_variant	0.711803	0.713453	0.710158	0.726312	0.558471	0.186 (3.93E-06)	0.000 (5.27E-01)	0.049 (1.46E-04)	0.055 (2.20E-06)
*sorted and listed in an ascending order of three-population P values.
Genes in black were previously identified as potential targets of selection while genes in red were novel.
